# Supplementary material for: Seasonal plasticity in the adult somatosensory cortex
Source: PubMed Central journal article supplement — Proc Natl Acad Sci U S A. 2020 Nov 30;117(50):32136–44. doi: 10.1073/pnas.1922888117 (PMC7749348; doi:10.1073/pnas.1922888117), 2020-11-30
Supplement: pnas.1922888117.sapp.pdf [file pnas.1922888117.sapp.pdf]

# PNAS

[www.pnas.org](http://www.pnas.org)

Supplementary Information for

Seasonal plasticity in the adult somatosensory cortex

Saikat Ray, Miao Li, Stefan Paul Koch, Susanne Mueller, Philipp Boehm-Sturm, Hong Wang, Michael Brecht, Robert Konrad Naumann\*

Saikat Ray, Robert Konrad Naumann

Email: [saikat.ray@weizmann.ac.il](mailto:saikat.ray@weizmann.ac.il), [robert@siat.ac.cn](mailto:robert@siat.ac.cn)

**This PDF file includes:**

Figures S1 to S9

Tables S1 to S4

## Supplementary Information

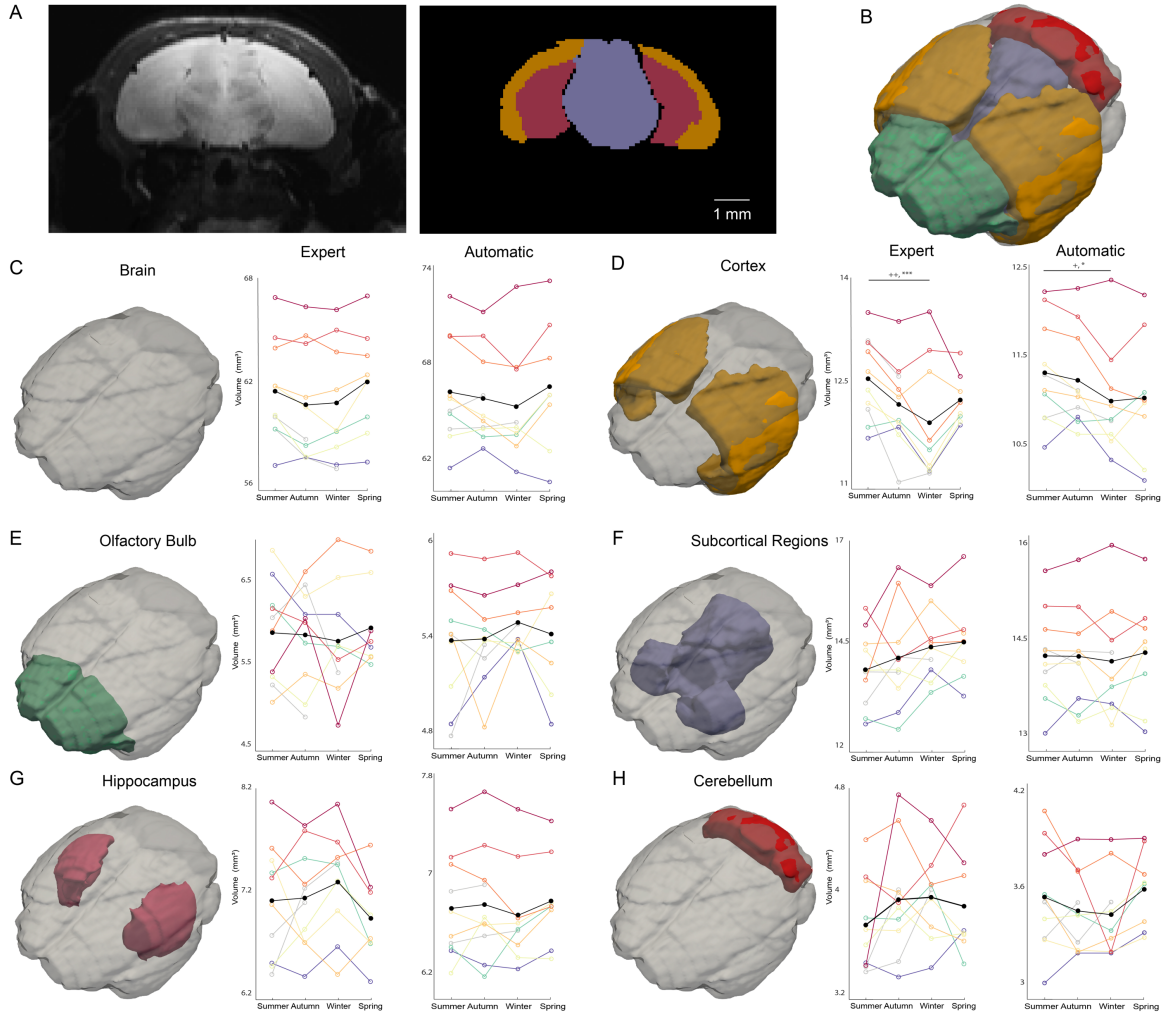

**Fig. S1. Seasonal changes in the brains of individual Etruscan shrews determined by manual and automated segmentation of brain regions.**

(A) Top, Magnetic resonance imaging was used to obtain T2-weighted images with an in-plane resolution of  $75 \times 75 \mu\text{m}$ , and  $250 \mu\text{m}$  between planes. Bottom, the brain was segmented into cortex (orange), hippocampus (pink), subcortical areas (purple), olfactory bulb (green) and cerebellum (red) and 3 dimensional volumes of these regions and the whole brain (gray) were obtained (B). Measurement of the volumes of the whole brain (C), cortex (D), olfactory bulb (E), subcortical regions (F), hippocampus (G) and cerebellum (H) indicates that only the cortex exhibits consistent shrinkage during winter with no pronounced effect of seasonal variation on the other areas of the brain. The left graph indicates volumes determined by expert-user segmentation, and the right graph indicates volumes determined by automatic segmentation.

Colors in graphs in **C-H** indicate individual animals.  
(Black dots indicate means; + indicates Cohen's  $d > 0.8$ , large effect; ++ indicates Cohen's  $d > 1.2$ , very large effect; \* indicates  $p < 0.05$ , \*\*\* indicates  $p < 0.001$ , two tailed paired t-test and  $p < 0.001$  One-way repeated measure ANOVA).  
For statistical information, see table S1.

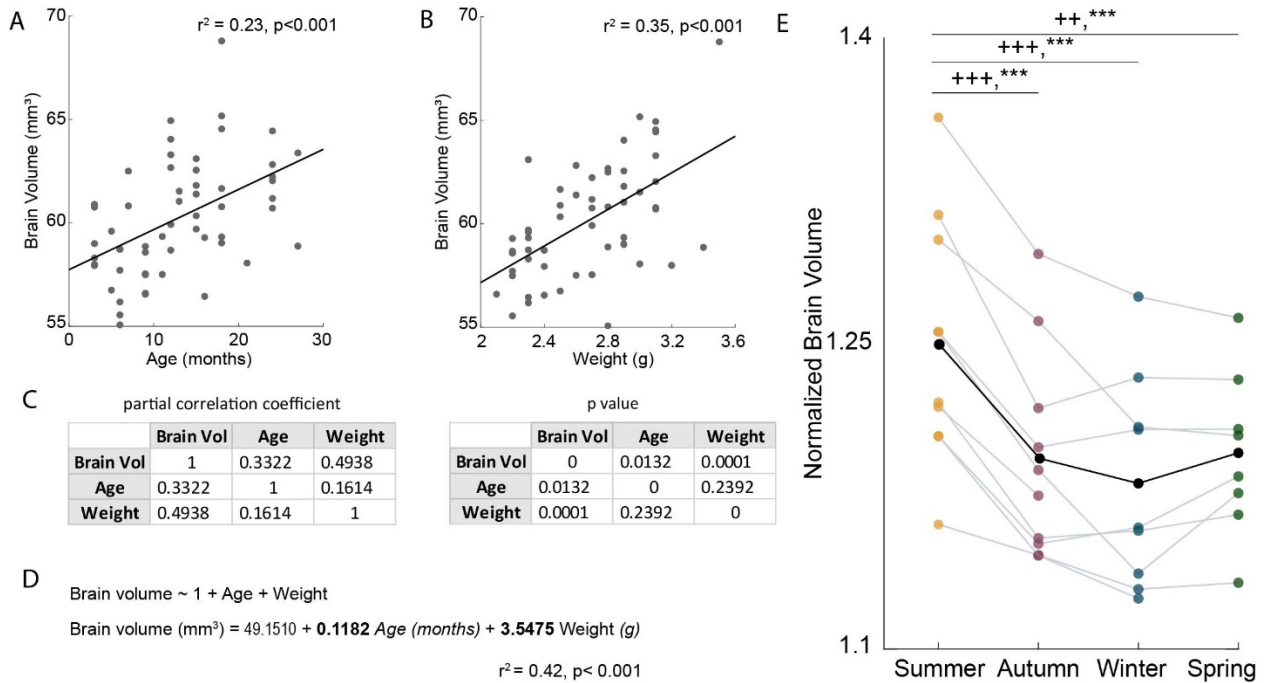

**Fig. S2. Shrew brain volume increases with age and weight and shows a more profound decline during winter on normalizing for these parameters.**

Brain volume of Etruscan shrews ( $n=56$ ) shows an increase with (A) the age and (B) the weight of a shrew. (C) Partial correlation values indicate a significant relationship between the age and weight of the shrew to its brain volume. (D) Implementing a generalized linear model to correct the brain volume for the age and weight of a shrew, indicates that (E) the normalized brain volumes in Etruscan shrews measured repeatedly over several seasons show a profound decline during autumn and winter.

(++ indicates Cohen's  $d > 1.2$ , very large effect; +++ indicates Cohen's  $d > 2$ , huge effect; \*\*\* indicates  $p < 0.001$ , two tailed paired t-test and  $p < 0.001$  One-way repeated measure ANOVA).

For statistical information, see table S1.

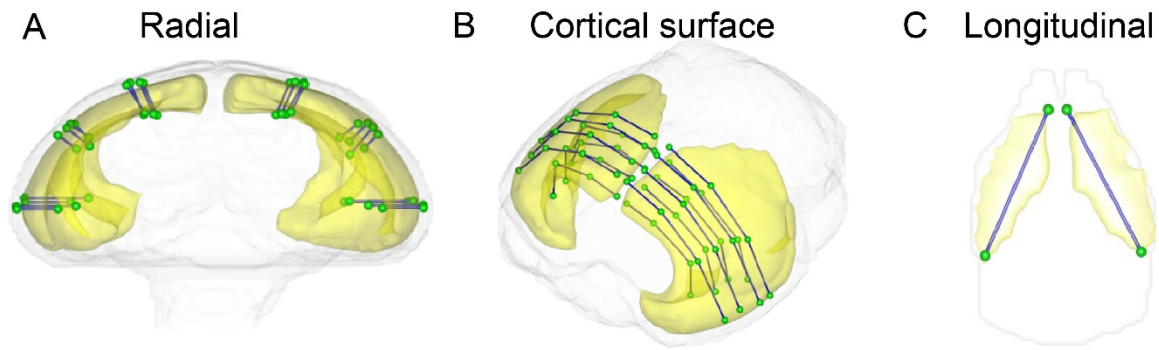

**Fig. S3. Determination of changes along different cortical axes.**

Measurements (purple lines) were made along radial (A), cortical surface (B) and longitudinal axes (C) of the cortex (yellow) in summer and winter, pairwise in the same animals ( $n = 9$  shrews) at 24 distinct locations (coordinates of nodes, marked in green here, in Table S2) to determine how the cortex changed from summer to winter along these axes. For the cortical surface and longitudinal axes, only a subset of measurement points are displayed for visual purposes. Specifically in the longitudinal axes, points were selected at different horizontal planes corresponding to the anterior (and medial) and posterior (and lateral) most points of the cortex in that plane.

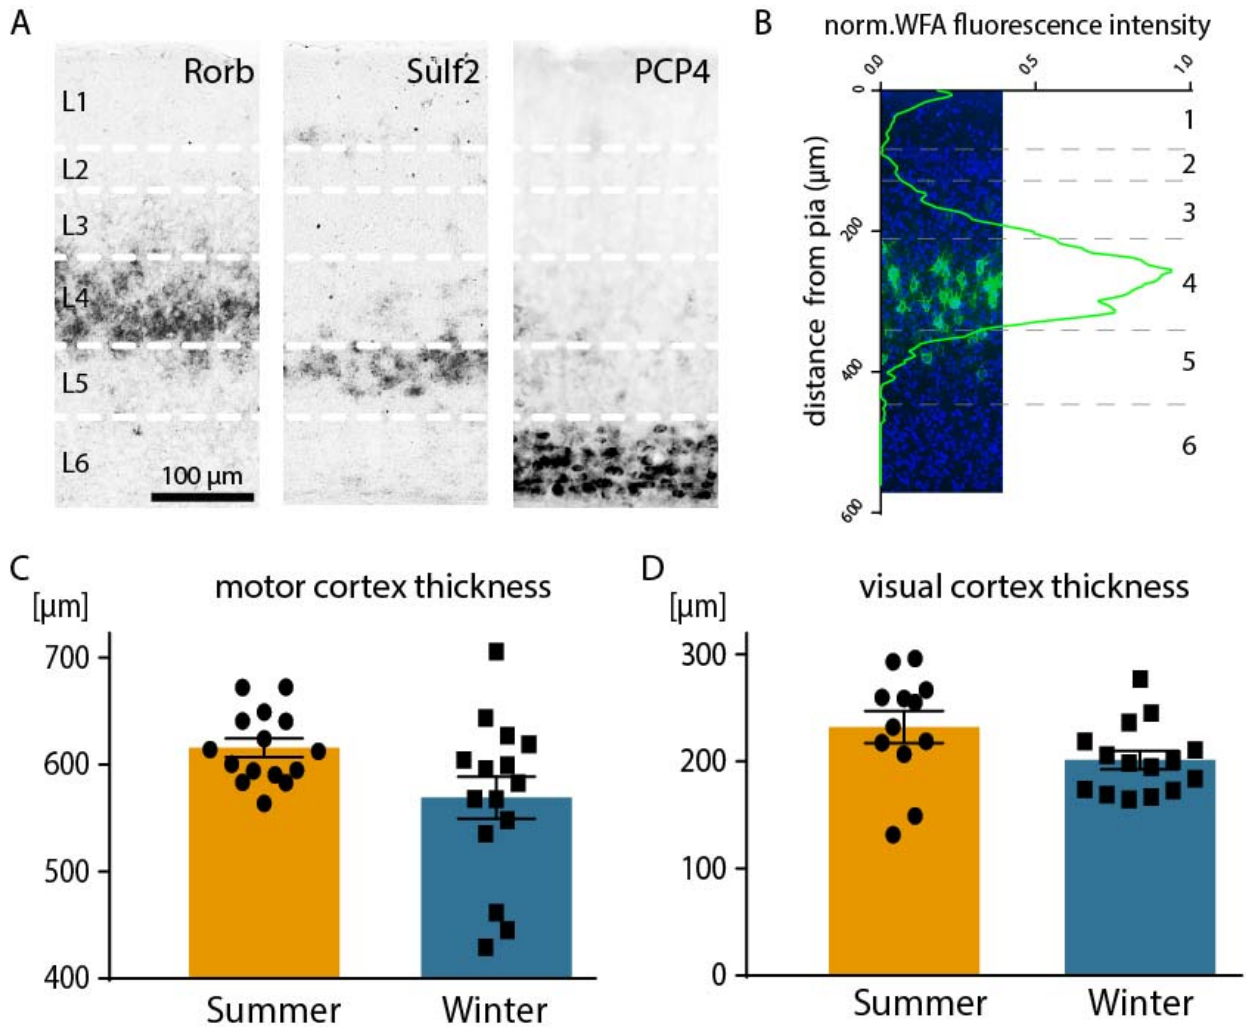

**Fig. S4. Cortical layers and cortical thickness in motor and visual cortices.**

**(A)** Gene expression (Rorb, Sulf2), immunohistochemistry (PCP4) and **(B)** histochemistry (WFA) demarcate the cortical layers in the somatosensory cortex with the WFA intensity peaking in layer 4 of the somatosensory cortex **(B)**. **(C)** The motor cortex (n=10 shrews, p=0.0477) and **(D)** visual cortex (n=9 shrews, p=0.0672) show a marginal decline in cortical thickness in the winter but are not statistically significant at the 95-percentile level on correcting for multiple comparisons (Two tailed Mann Whitney U test, Bonferroni corrected  $\alpha = 0.017$ ). Error bars are mean  $\pm$  SEM.

For statistical information, see table S1.

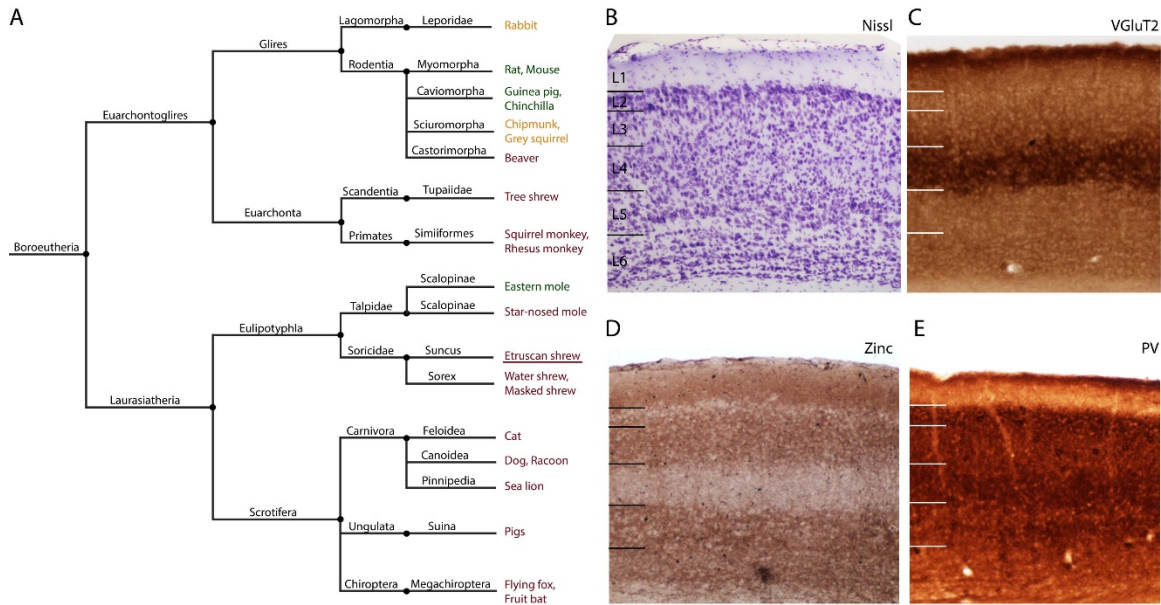

**Fig. S5. Etruscan shrews lack anatomically defined barrels for whiskers in layer 4 of the somatosensory cortex.**

(A) Phylogenetic tree indicating species lacking whisker barrels in layer 4 of somatosensory cortex (red), those having indistinct barrels (orange) or clearly defined barrels (green). The Etruscan shrew, like most other mammals with whiskers, lacks barrels.

(B) Nissl histochemistry of somatosensory cortex of an Etruscan shrew showing no barrels.

(C) Immunohistochemistry for vesicular glutamate 2 in the somatosensory cortex of an Etruscan shrew showing no barrels.

(D) Histochemistry for zinc in the somatosensory cortex of an Etruscan shrew showing no barrels.

(E) Immunohistochemistry for parvalbumin in the somatosensory cortex of an Etruscan shrew showing no barrels.

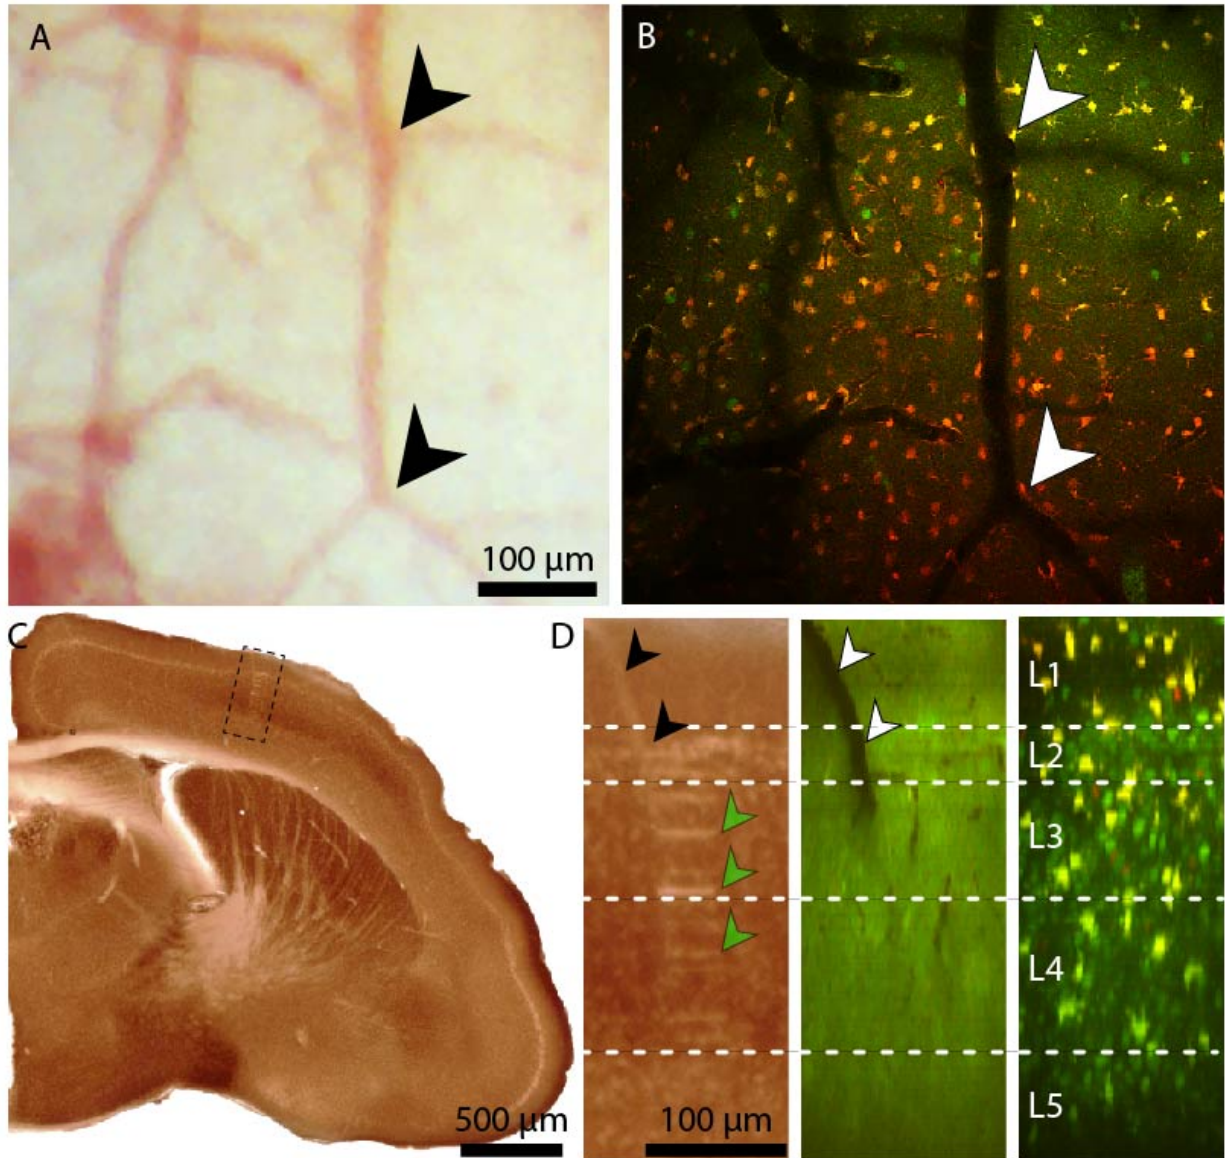

**Fig. S6. Regional and laminar alignment of 2-photon imaging and cytochrome oxidase histology.**

(A) Surface blood vessel pattern for an imaging region. Black arrowheads indicate blood vessels used for alignment to 2-photon image shown in (B) where corresponding blood vessels are indicating by white arrowheads. (C) Cytochrome oxidase (CO) staining was used to locate 2-photon imaging sites (dashed box) based on aligning blood vessel patterns visible in CO staining (D, left panel, black arrows) and minimum intensity projections of resliced z-stacks (D, middle panel, white arrows). Additionally, faint reductions in cytochrome oxidase activity were visible at imaging sites (D, left panel, green arrows), enabling precise laminar alignment. (D, right panel) shows a maximum intensity projection of the same location.



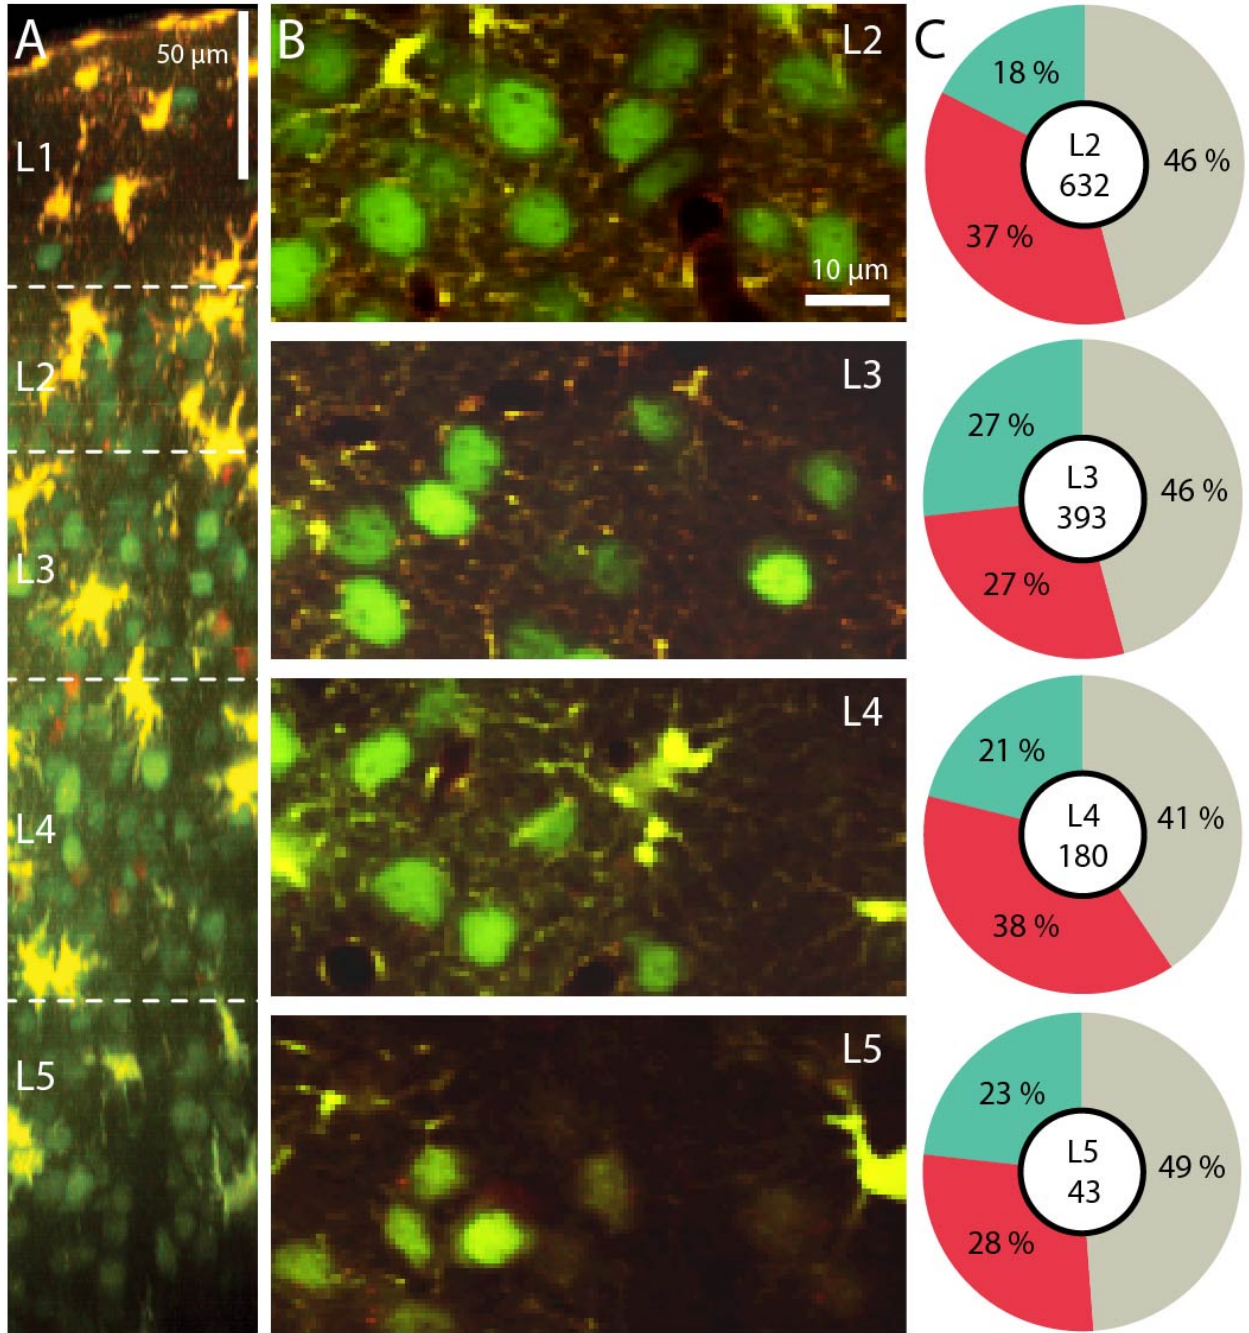

**Fig. S7. Two-photon imaging across cortical layers.**

(A) Slice through a z-stack of a shrew with two photon imaging performed in layer 2 (B), layer 3 to layer 5 from top to bottom. (C) Cells that were reliably activated (green), suppressed (red) or unmodulated (gray) on touch across each layer. The number in the center of the circle denotes cells recorded in the respective condition.

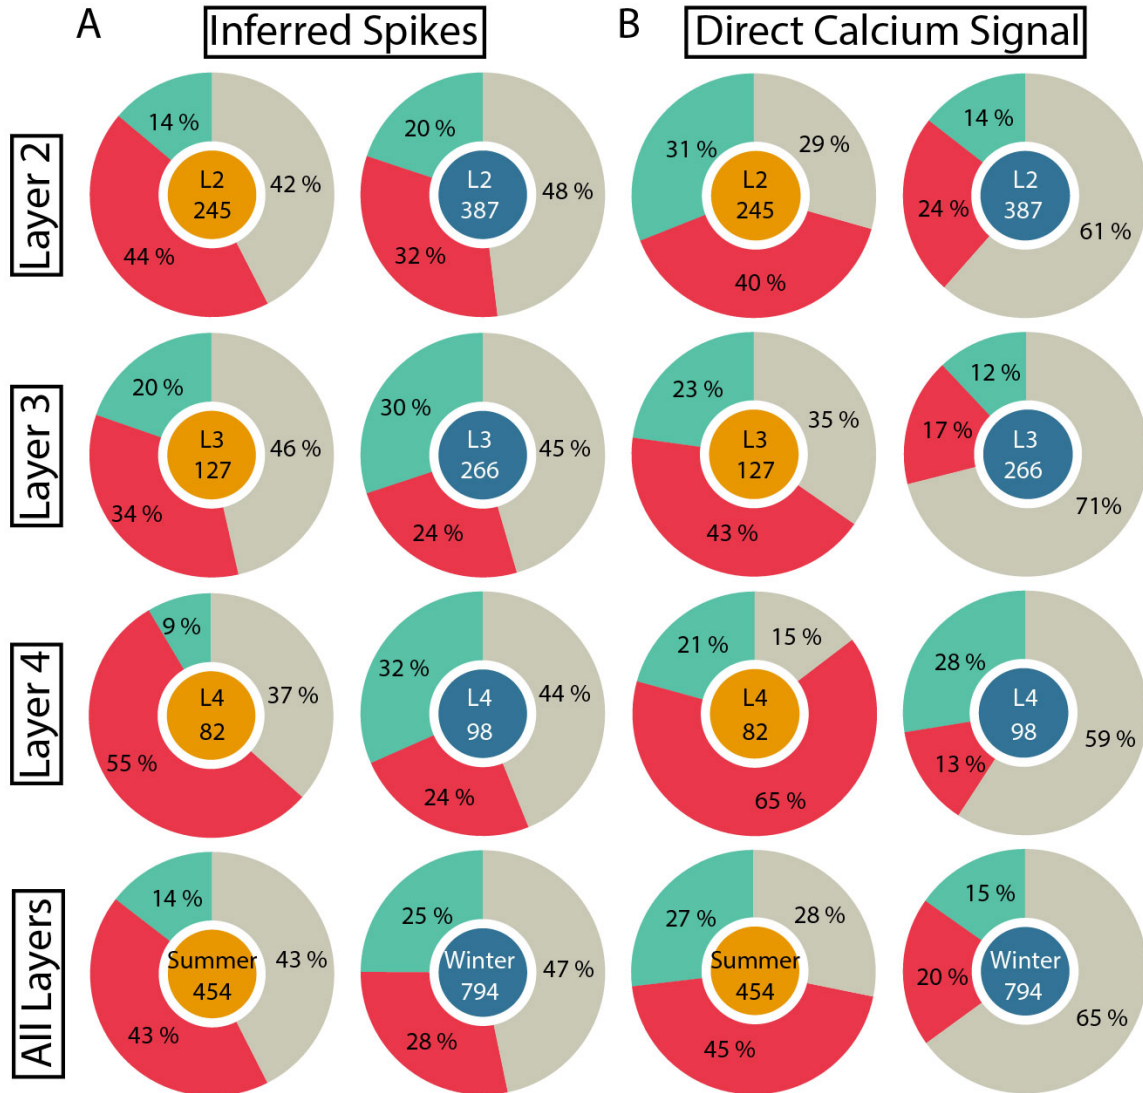

**Fig. S8. Two-photon imaging across different seasons with determination of activation and suppression by inferred spikes or directly by fluorescence intensities.**

Overall and layer specific responses of cells in the summer and winter based on inferred spikes (A) or directly on fluorescence intensities (B) for layer 2, layer 3, and layer 4 confirms that a lower fraction of cells are suppressed on touch during winter. The number in the center of the circle denotes cells recorded in the respective condition.

For statistical information, see table S1.

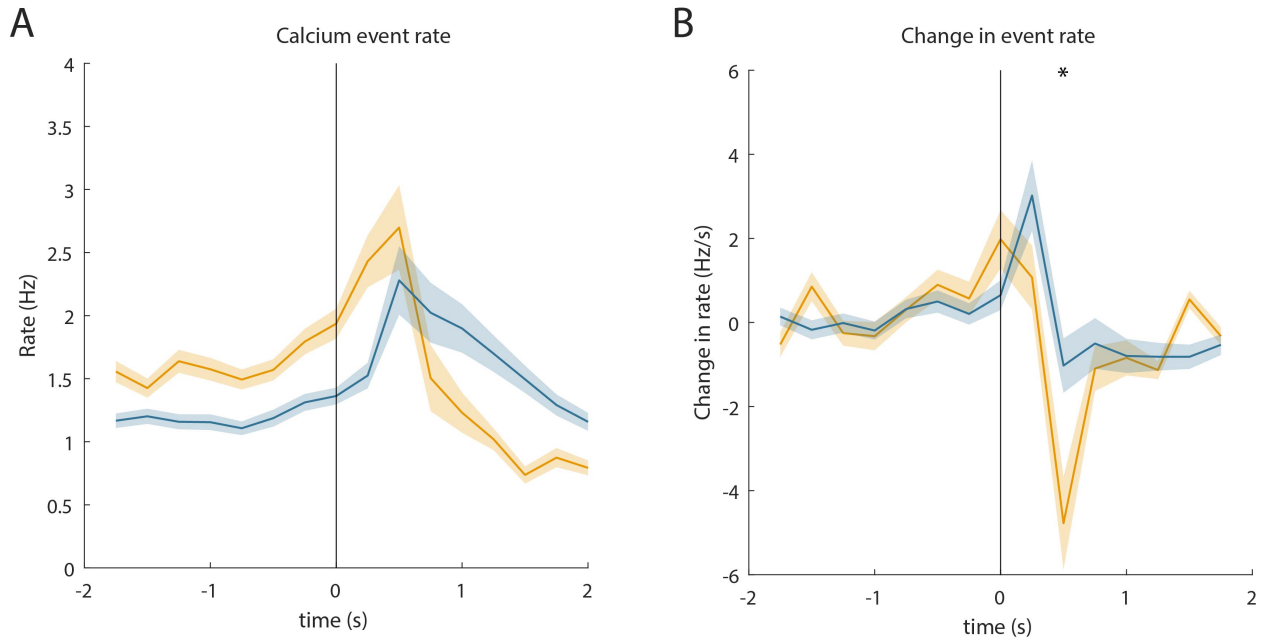

**Fig. S9. Responses of cells attenuate faster after touch in summer.**

(A) The calcium event rate (mean  $\pm$ SEM) of cells in summer (orange, n=454 cells, 5 shrews) and winter (blue, n=794 cells, 7 shrews) aligned to whisker stimulation. (B) The change in the event rate (mean  $\pm$ SEM) of cells in summer and winter aligned to whisker stimulation indicates significantly faster response attenuation during summer. ( $p=0.0017$ , Two tailed unpaired t-test, Bonferroni corrected  $\alpha = 0.0031$ ). For statistical information, see table S1.

**Table S1. Experiments and respective statistical analyses.**

| Figure             | Experiment                  | Number of measurements | Number of animals | Mean $\pm$ SE                                                                                          | Effect Size (Cohen's d) | Significance (p-value)                                                                                    | Statistical test                                                        |
|--------------------|-----------------------------|------------------------|-------------------|--------------------------------------------------------------------------------------------------------|-------------------------|-----------------------------------------------------------------------------------------------------------|-------------------------------------------------------------------------|
| 1C (summer-autumn) | Brain Volume (% change)     | 10                     | 10                | -0.93 $\pm$ 0.32                                                                                       | 0.91                    | 0.019                                                                                                     | Two tailed Paired t-test                                                |
| 1C (summer-winter) | Brain Volume (% change)     | 9                      | 9                 | -1.47 $\pm$ 0.38                                                                                       | 1.29                    | 0.004                                                                                                     | Two tailed Paired t-test                                                |
| 1C (summer-spring) | Brain Volume (% change)     | 8                      | 8                 | -0.03 $\pm$ 0.38                                                                                       | 0.03                    | 0.93                                                                                                      | Two tailed Paired t-test                                                |
| 1C                 | Brain Volume (% change)     | 7                      | 7                 | -1.06 $\pm$ 0.45 (summer-autumn); -1.50 $\pm$ 0.49 (summer-winter); -0.11 $\pm$ 0.42 (summer-spring)   | -                       | 0.002                                                                                                     | One-way repeated measure ANOVA                                          |
| 1D (summer-autumn) | Cortex Volume (% change)    | 10                     | 10                | -1.72 $\pm$ 0.55                                                                                       | 0.97                    | 0.013                                                                                                     | Two tailed Paired t-test                                                |
| 1D (summer-winter) | Cortex Volume (% change)    | 9                      | 9                 | -3.76 $\pm$ 0.95                                                                                       | 1.32                    | 0.004                                                                                                     | Two tailed Paired t-test                                                |
| 1D (summer-spring) | Cortex Volume (% change)    | 8                      | 8                 | -2.67 $\pm$ 0.77                                                                                       | 1.23                    | 0.010                                                                                                     | Two tailed Paired t-test                                                |
| 1D                 | Cortex Volume (% change)    | 7                      | 7                 | -1.34 $\pm$ 0.73 (summer-autumn); -3.80 $\pm$ 1.24 (summer-winter); -2.81 $\pm$ 0.88 (summer-spring)   | -                       | <0.001                                                                                                    | One-way repeated measure ANOVA                                          |
| 1D                 | Body Weight (g)             | 7                      | 7                 | 2.27 $\pm$ 0.08 (summer); 2.61 $\pm$ 0.13 (autumn); 2.69 $\pm$ 0.16 (winter); 2.69 $\pm$ 0.18 (spring) | -                       | <0.001                                                                                                    | One-way repeated measure ANOVA                                          |
| 1F                 | Cortical axes changes       | 648                    | 9                 | -                                                                                                      | -                       | 0.234 (radial-longitudinal); <0.00001 (radial-cortical surface); <0.00001 (longitudinal-cortical surface) | Two tailed Fisher's exact test (Bonferroni corrected $\alpha = 0.017$ ) |
| 2B                 | Cortex Thickness ( $\mu$ m) | 152                    | 15                | 544.32 $\pm$ 4.58 (summer); 495.68 $\pm$ 6.36 (winter)                                                 | 1.03                    | <0.00001                                                                                                  | Two tailed Mann Whitney U test (Bonferroni corrected $\alpha = 0.017$ ) |

|                 |                                       |      |    |                                                                            |                                                    |                                                            |                                                                         |
|-----------------|---------------------------------------|------|----|----------------------------------------------------------------------------|----------------------------------------------------|------------------------------------------------------------|-------------------------------------------------------------------------|
| 2D (L1)         | Cortex Thickness (μm)                 | 97   | 15 | 71.88 ± 2.98 (summer 1); 74.56 ± 2.32 (winter); 88.25 ± 2.60 (summer 2)    | 0.17 (summer 1 – winter); 0.99 (summer 2 – winter) | 0.2983 (summer 1 – winter); 0.0001 (summer 2 – winter)     | Two tailed Mann Whitney U test (Bonferroni corrected $\alpha = 0.004$ ) |
| 2D (L2)         | Cortex Thickness (μm)                 | 97   | 15 | 41.86 ± 0.95 (summer 1); 40.75 ± 1.66 (winter); 43.06 ± 2.16 (summer 2)    | 0.13 (summer 1 – winter); 0.22 (summer 2 – winter) | 0.5552 (summer 1 – winter); 0.6031 (summer 2 – winter)     | Two tailed Mann Whitney U test (Bonferroni corrected $\alpha = 0.004$ ) |
| 2D (L3)         | Cortex Thickness (μm)                 | 97   | 15 | 86.30 ± 2.65 (summer 1); 99.27 ± 5.09 (winter); 97.39 ± 4.91 (summer 2)    | 0.54 (summer 1 – winter); 0.07 (summer 2 – winter) | 0.0455 (summer 1 – winter); 0.6745 (summer 2 – winter)     | Two tailed Mann Whitney U test (Bonferroni corrected $\alpha = 0.004$ ) |
| 2D (L4)         | Cortex Thickness (μm)                 | 97   | 15 | 165.07 ± 2.84 (summer 1); 119.33 ± 4.88 (winter); 153.18 ± 4.45 (summer 2) | 1.94 (summer 1 – winter); 1.27 (summer 2 – winter) | <0.00001 (summer 1 – winter); <0.00001 (summer 2 – winter) | Two tailed Mann Whitney U test (Bonferroni corrected $\alpha = 0.004$ ) |
| 2D (L5)         | Cortex Thickness (μm)                 | 97   | 15 | 84.44 ± 3.43 (summer 1); 98.62 ± 5.55 (winter); 104.60 ± 3.52 (summer 2)   | 0.52 (summer 1 – winter); 0.22 (summer 2 – winter) | 0.1285 (summer 1 – winter); 0.1236 (summer 2 – winter)     | Two tailed Mann Whitney U test (Bonferroni corrected $\alpha = 0.004$ ) |
| 2D (L6)         | Cortex Thickness (μm)                 | 96   | 15 | 70.41 ± 2.41 (summer 1); 66.92 ± 3.25 (winter); 73.22 ± 2.81 (summer 2)    | 0.21 (summer 1 – winter); 0.36 (summer 2 – winter) | 0.2757 (summer 1 – winter); 0.1362 (summer 2 – winter)     | Two tailed Mann Whitney U test (Bonferroni corrected $\alpha = 0.004$ ) |
| 2F              | Neuron Density (per mm <sup>2</sup> ) | 3864 | 10 | 25933 ± 759 (summer); 18214 ± 789 (winter)                                 | 2.62                                               | <0.00001                                                   | Two tailed Mann Whitney U test                                          |
| 2F              | Neuron Density (per mm <sup>3</sup> ) | 3864 | 10 | 169954 ± 5675 (summer); 148120 ± 8454 (winter)                             | 0.84                                               | 0.0751                                                     | Two tailed Mann Whitney U test                                          |
| 3F (suppressed) | Cell responses                        | 420  | 12 | 43% (summer); 28% (winter)                                                 | -                                                  | <0.0001                                                    | z-test                                                                  |
| 3G (L2)         | Cell responses                        | 342  | 12 | -                                                                          | -                                                  | 0.006                                                      | Chi-square test (Bonferroni corrected $\alpha = 0.017$ )                |
| 3G (L3)         | Cell responses                        | 213  | 12 | -                                                                          | -                                                  | 0.012                                                      | Chi-square test (Bonferroni corrected $\alpha = 0.017$ )                |

|                             |                                       |     |    |                                                                                            |      |         |                                                          |
|-----------------------------|---------------------------------------|-----|----|--------------------------------------------------------------------------------------------|------|---------|----------------------------------------------------------|
| 3G (L4)                     | Cell responses                        | 107 | 12 | -                                                                                          | -    | <0.0001 | Chi-square test (Bonferroni corrected $\alpha = 0.017$ ) |
| 4C                          | Neuron Density (per mm <sup>2</sup> ) | 509 | 10 | 3133 ± 137 (summer); 2522 ± 180 (winter)                                                   | 0.98 | 0.0151  | Two tailed Mann Whitney U test                           |
| 4E                          | Brain volume (% change)               | 7   | 7  | -1.93 ± 0.29                                                                               | 2.48 | <0.001  | Two tailed Paired t-test                                 |
| 4E                          | Brain Volume (% change)               | 7   | 7  | -1.93 ± 0.29 (summer-summer limited food)                                                  | -    | 0.002   | One-way repeated measure ANOVA                           |
| 4E                          | Cortex volume (% change)              | 7   | 7  | -6.72 ± 1.50                                                                               | 1.69 | 0.004   | Two tailed Paired t-test                                 |
| 4E                          | Cortex Volume (% change)              | 7   | 7  | -6.72 ± 1.50 (summer-summer limited food)                                                  | -    | <0.001  | One-way repeated measure ANOVA                           |
| 4E                          | Olfactory bulb volume (% change)      | 7   | 7  | 0.22 ± 2.73                                                                                | 0.03 | 0.940   | Two tailed Paired t-test                                 |
| 4E                          | Olfactory bulb volume (% change)      | 7   | 7  | 0.22 ± 2.73 (summer-summer limited food)                                                   | -    | 0.994   | One-way repeated measure ANOVA                           |
| 4E                          | Subcortical regions volume (% change) | 7   | 7  | -0.06 ± 1.14                                                                               | 0.02 | 0.957   | Two tailed Paired t-test                                 |
| 4E                          | Subcortical regions volume (% change) | 7   | 7  | -0.06 ± 1.14 (summer-summer limited food)                                                  | -    | 0.105   | One-way repeated measure ANOVA                           |
| 4E                          | Hippocampus volume (% change)         | 7   | 7  | -3.00 ± 2.32                                                                               | 0.49 | 0.24    | Two tailed Paired t-test                                 |
| 4E                          | Hippocampus volume (% change)         | 7   | 7  | -3.00 ± 2.32 (summer-summer limited food)                                                  | -    | 0.392   | One-way repeated measure ANOVA                           |
| 4E                          | Cerebellum volume (% change)          | 7   | 7  | 5.42 ± 2.29                                                                                | 0.89 | 0.056   | Two tailed Paired t-test                                 |
| 4E                          | Cerebellum volume (% change)          | 7   | 7  | 5.42 ± 2.29 (summer-summer limited food)                                                   | -    | 0.068   | One-way repeated measure ANOVA                           |
|                             |                                       |     |    |                                                                                            |      |         |                                                          |
| S1C (summer-autumn; expert) | Brain volume (mm <sup>3</sup> )       | 10  | 10 | 61.42 ± 0.94 (summer); 60.63 ± 1.06 (autumn)                                               | 0.83 | 0.027   | Two tailed Paired t-test                                 |
| S1C (summer-winter; expert) | Brain volume (mm <sup>3</sup> )       | 9   | 9  | 61.59 ± 1.03 (summer); 60.74 ± 1.16 (winter)                                               | 0.6  | 0.053   | Two tailed Paired t-test                                 |
| S1C (summer-spring; expert) | Brain volume (mm <sup>3</sup> )       | 8   | 8  | 61.89 ± 1.12 (summer); 61.94 ± 1.11 (spring)                                               | 0.89 | 0.814   | Two tailed Paired t-test                                 |
| S1C (expert)                | Brain volume (mm <sup>3</sup> )       | 7   | 7  | 61.51 ± 1.22 (summer); 60.84 ± 1.32 (autumn); 60.69 ± 1.24 (winter); 61.57 ± 1.21 (spring) | -    | <0.001  | One-way repeated measure ANOVA                           |

|                                |                                          |    |    |                                                                                            |      |        |                                |
|--------------------------------|------------------------------------------|----|----|--------------------------------------------------------------------------------------------|------|--------|--------------------------------|
| SIC (summer-autumn; automated) | Brain volume (mm <sup>3</sup> )          | 10 | 10 | 66.17 ± 1.06 (summer); 65.77 ± 0.92 (autumn)                                               | 0.83 | 0.280  | Two tailed Paired t-test       |
| SIC (summer-winter; automated) | Brain volume (mm <sup>3</sup> )          | 9  | 9  | 66.30 ± 1.76 (summer); 65.26 ± 1.18 (winter)                                               | 0.6  | 0.057  | Two tailed Paired t-test       |
| SIC (summer-spring; automated) | Brain volume (mm <sup>3</sup> )          | 8  | 8  | 66.61 ± 1.29 (summer); 66.52 ± 1.45 (spring)                                               | 0.89 | 0.815  | Two tailed Paired t-test       |
| SIC (automated)                | Brain volume (mm <sup>3</sup> )          | 7  | 7  | 66.17 ± 1.40 (summer); 65.45 ± 1.17 (autumn); 65.07 ± 1.50 (winter); 65.97 ± 1.54 (spring) | -    | 0.160  | One-way repeated measure ANOVA |
| S1D (summer-autumn; expert)    | Cortex Volume (mm <sup>3</sup> )         | 10 | 10 | 12.54 ± 0.19 (summer); 12.16 ± 0.20 (autumn)                                               | 1.03 | 0.01   | Two tailed Paired t-test       |
| S1D (summer-winter; expert)    | Cortex Volume (mm <sup>3</sup> )         | 9  | 9  | 12.47 ± 0.20 (summer); 11.90 ± 0.30 (winter)                                               | 1.26 | 0.009  | Two tailed Paired t-test       |
| S1D (summer-spring; expert)    | Cortex Volume (mm <sup>3</sup> )         | 8  | 8  | 12.52 ± 0.22 (summer); 12.23 ± 0.13 (spring)                                               | 0.78 | 0.074  | Two tailed Paired t-test       |
| S1D (expert)                   | Cortex Volume (mm <sup>3</sup> )         | 7  | 7  | 12.45 ± 0.24 (summer); 12.20 ± 0.22 (autumn); 11.85 ± 0.34 (winter); 12.12 ± 0.10 (spring) | -    | <0.001 | One-way repeated measure ANOVA |
| S1D (summer-autumn; automated) | Cortex Volume (mm <sup>3</sup> )         | 10 | 10 | 11.30 ± 0.18 (summer); 11.21 ± 0.17 (autumn)                                               | 0.42 | 0.217  | Two tailed Paired t-test       |
| S1D (summer-winter; automated) | Cortex Volume (mm <sup>3</sup> )         | 9  | 9  | 11.36 ± 0.20 (summer); 10.98 ± 0.20 (winter)                                               | 0.95 | 0.021  | Two tailed Paired t-test       |
| S1D (summer-spring; automated) | Cortex Volume (mm <sup>3</sup> )         | 8  | 8  | 11.37 ± 0.22 (summer); 11.02 ± 0.25 (spring)                                               | 1.04 | 0.008  | Two tailed Paired t-test       |
| S1D (automated)                | Cortex Volume (mm <sup>3</sup> )         | 7  | 7  | 11.26 ± 0.23 (summer); 11.17 ± 0.22 (autumn); 10.95 ± 0.25 (winter); 10.90 ± 0.18 (spring) | -    | 0.004  | One-way repeated measure ANOVA |
| S1E (summer-autumn; expert)    | Olfactory bulb volume (mm <sup>3</sup> ) | 10 | 10 | 5.87 ± 0.19 (summer); 5.84 ± 0.19 (autumn)                                                 | 0.06 | 0.854  | Two tailed Paired t-test       |
| S1E (summer-winter; expert)    | Olfactory bulb volume (mm <sup>3</sup> ) | 9  | 9  | 5.94 ± 0.20 (summer); 5.77 ± 0.23 (winter)                                                 | 0.17 | 0.301  | Two tailed Paired t-test       |
| S1E (summer-spring; expert)    | Olfactory bulb volume (mm <sup>3</sup> ) | 8  | 8  | 5.93 ± 0.23 (summer); 5.93 ± 0.18 (spring)                                                 | 0.09 | 0.996  | Two tailed Paired t-test       |
| S1E (expert)                   | Olfactory bulb volume (mm <sup>3</sup> ) | 7  | 7  | 5.90 ± 0.26 (summer); 5.88 ± 0.22 (autumn);                                                | -    | 0.606  | One-way repeated               |

|                                          |                                                     |    |    |                                                                                                           |      |       |                                         |
|------------------------------------------|-----------------------------------------------------|----|----|-----------------------------------------------------------------------------------------------------------|------|-------|-----------------------------------------|
|                                          |                                                     |    |    | 5.85 ± 0.29<br>(winter); 5.95 ± 0.21 (spring)                                                             |      |       | measure<br>ANOVA                        |
| S1E<br>(summer-<br>autumn;<br>automated) | Olfactory bulb<br>volume (mm <sup>3</sup> )         | 10 | 10 | 5.36 ± 0.12<br>(summer); 5.37<br>± 0.09 (autumn)                                                          | 0.03 | 0.913 | Two tailed<br>Paired t-test             |
| S1E<br>(summer-<br>winter;<br>automated) | Olfactory bulb<br>volume (mm <sup>3</sup> )         | 9  | 9  | 5.36 ± 0.13<br>(summer); 5.48<br>± 0.07 (winter)                                                          | 0.52 | 0.521 | Two tailed<br>Paired t-test             |
| S1E<br>(summer-<br>spring;<br>automated) | Olfactory bulb<br>volume (mm <sup>3</sup> )         | 8  | 8  | 5.43 ± 0.09<br>(summer); 5.41<br>± 0.13 (spring)                                                          | 0.26 | 0.634 | Two tailed<br>Paired t-test             |
| S1E<br>(automated)                       | Olfactory bulb<br>volume (mm <sup>3</sup> )         | 7  | 7  | 5.37 ± 0.12<br>(summer); 5.33<br>± 0.10 (autumn);<br>5.42 ± 0.06<br>(winter); 5.35 ±<br>0.13 (spring)     | -    | 0.092 | One-way<br>repeated<br>measure<br>ANOVA |
| S1F<br>(summer-<br>autumn;<br>expert)    | Subcortical<br>regions volume<br>(mm <sup>3</sup> ) | 10 | 10 | 13.85 ± 0.30<br>(summer); 14.12<br>± 0.39 (autumn)                                                        | 0.25 | 0.442 | Two tailed<br>Paired t-test             |
| S1F<br>(summer-<br>winter;<br>expert)    | Subcortical<br>regions volume<br>(mm <sup>3</sup> ) | 9  | 9  | 13.85 ± 0.33<br>(summer); 14.40<br>± 0.29 (winter)                                                        | 0.78 | 0.049 | Two tailed<br>Paired t-test             |
| S1F<br>(summer-<br>spring;<br>expert)    | Subcortical<br>regions volume<br>(mm <sup>3</sup> ) | 8  | 8  | 13.96 ± 0.36<br>(summer); 14.52<br>± 0.36 (spring)                                                        | 0.93 | 0.063 | Two tailed<br>Paired t-test             |
| S1F (expert)                             | Subcortical<br>regions volume<br>(mm <sup>3</sup> ) | 7  | 7  | 13.76 ± 0.34<br>(summer); 14.17<br>± 0.57 (autumn);<br>14.42 ± 0.37<br>(winter); 14.47 ±<br>0.41 (spring) | -    | 0.078 | One-way<br>repeated<br>measure<br>ANOVA |
| S1F<br>(summer-<br>autumn;<br>automated) | Subcortical<br>regions volume<br>(mm <sup>3</sup> ) | 10 | 10 | 14.21 ± 0.23<br>(summer); 14.21<br>± 0.25 (autumn)                                                        | 0.02 | 0.943 | Two tailed<br>Paired t-test             |
| S1F<br>(summer-<br>winter;<br>automated) | Subcortical<br>regions volume<br>(mm <sup>3</sup> ) | 9  | 9  | 14.24 ± 0.26<br>(summer); 14.13<br>± 0.30 (winter)                                                        | 0.17 | 0.678 | Two tailed<br>Paired t-test             |
| S1F<br>(summer-<br>spring;<br>automated) | Subcortical<br>regions volume<br>(mm <sup>3</sup> ) | 8  | 8  | 14.23 ± 0.29<br>(summer); 14.26<br>± 0.31 (spring)                                                        | 0.16 | 0.781 | Two tailed<br>Paired t-test             |
| S1F<br>(automated)                       | Subcortical<br>regions volume<br>(mm <sup>3</sup> ) | 7  | 7  | 14.12 ± 0.31<br>(summer); 14.10<br>± 0.34 (autumn);<br>14.06 ± 0.38<br>(winter); 14.18 ±<br>0.35 (spring) | -    | 0.706 | One-way<br>repeated<br>measure<br>ANOVA |
| S1G<br>(summer-<br>autumn;<br>expert)    | Hippocampus<br>volume (mm <sup>3</sup> )            | 10 | 10 | 7.10 ± 0.18<br>(summer); 7.12<br>± 0.15 (autumn)                                                          | 0.05 | 0.88  | Two tailed<br>Paired t-test             |
| S1G<br>(summer-<br>winter;<br>expert)    | Hippocampus<br>volume (mm <sup>3</sup> )            | 9  | 9  | 7.14 ± 0.20<br>(summer); 7.27<br>± 0.17 (winter)                                                          | 0.31 | 0.49  | Two tailed<br>Paired t-test             |
| S1G<br>(summer-<br>spring;<br>expert)    | Hippocampus<br>volume (mm <sup>3</sup> )            | 8  | 8  | 7.23 ± 0.19<br>(summer); 6.93<br>± 0.15 (spring)                                                          | 0.38 | 0.102 | Two tailed<br>Paired t-test             |



|                                |                                       |    |    |                                                                                        |      |        |                                |
|--------------------------------|---------------------------------------|----|----|----------------------------------------------------------------------------------------|------|--------|--------------------------------|
| S1G (expert)                   | Hippocampus volume (mm <sup>3</sup> ) | 7  | 7  | 7.22 ± 0.22 (summer); 7.02 ± 0.20 (autumn); 7.19 ± 0.21 (winter); 6.89 ± 0.16 (spring) | -    | 0.165  | One-way repeated measure ANOVA |
| S1G (summer-autumn; automated) | Hippocampus volume (mm <sup>3</sup> ) | 10 | 10 | 6.72 ± 0.13 (summer); 6.75 ± 0.14 (autumn)                                             | 0.16 | 0.621  | Two tailed Paired t-test       |
| S1G (summer-winter; automated) | Hippocampus volume (mm <sup>3</sup> ) | 9  | 9  | 6.75 ± 0.14 (summer); 6.66 ± 0.14 (winter)                                             | 0.32 | 0.511  | Two tailed Paired t-test       |
| S1G (summer-spring; automated) | Hippocampus volume (mm <sup>3</sup> ) | 8  | 8  | 6.74 ± 0.16 (summer); 6.78 ± 0.13 (spring)                                             | 0.30 | 0.576  | Two tailed Paired t-test       |
| S1G (automated)                | Hippocampus volume (mm <sup>3</sup> ) | 7  | 7  | 6.68 ± 0.18 (summer); 6.70 ± 0.19 (autumn); 6.61 ± 0.16 (winter); 6.72 ± 0.14 (spring) | -    | 0.746  | One-way repeated measure ANOVA |
| S1H (summer-autumn; expert)    | Cerebellum volume (mm <sup>3</sup> )  | 10 | 10 | 3.72 ± 0.11 (summer); 3.92 ± 0.14 (autumn)                                             | 0.44 | 0.359  | Two tailed Paired t-test       |
| S1H (summer-winter; expert)    | Cerebellum volume (mm <sup>3</sup> )  | 9  | 9  | 3.76 ± 0.12 (summer); 3.94 ± 0.11 (winter)                                             | 0.48 | 0.273  | Two tailed Paired t-test       |
| S1H (summer-spring; expert)    | Cerebellum volume (mm <sup>3</sup> )  | 8  | 8  | 3.81 ± 0.12 (summer); 3.87 ± 0.15 (spring)                                             | 0.34 | 0.679  | Two tailed Paired t-test       |
| S1H (expert)                   | Cerebellum volume (mm <sup>3</sup> )  | 7  | 7  | 3.76 ± 0.14 (summer); 3.98 ± 0.19 (autumn); 3.90 ± 0.14 (winter); 3.76 ± 0.11 (spring) | -    | 0.309  | One-way repeated measure ANOVA |
| S1H (summer-autumn; automated) | Cerebellum volume (mm <sup>3</sup> )  | 10 | 10 | 3.53 ± 0.10 (summer); 3.44 ± 0.08 (autumn)                                             | 0.40 | 0.239  | Two tailed Paired t-test       |
| S1H (summer-winter; automated) | Cerebellum volume (mm <sup>3</sup> )  | 9  | 9  | 3.53 ± 0.12 (summer); 3.42 ± 0.09 (winter)                                             | 0.39 | 0.176  | Two tailed Paired t-test       |
| S1H (summer-spring; automated) | Cerebellum volume (mm <sup>3</sup> )  | 8  | 8  | 3.57 ± 0.13 (summer); 3.58 ± 0.09 (spring)                                             | 0.23 | 0.850  | Two tailed Paired t-test       |
| S1H (automated)                | Cerebellum volume (mm <sup>3</sup> )  | 7  | 7  | 3.51 ± 0.13 (summer); 3.42 ± 0.11 (autumn); 3.44 ± 0.11 (winter); 3.54 ± 0.09 (spring) | -    | 0.0504 | One-way repeated measure ANOVA |
| S2E (summer-autumn)            | Normalized Brain volume               | 10 | 10 | 1.25 ± 0.02 (summer); 1.19 ± 1.02 (autumn)                                             | 2.68 | <0.001 | Two tailed Paired t-test       |
| S2E (summer-winter)            | Normalized Brain volume               | 9  | 9  | 1.25 ± 0.02 (summer); 1.18 ± 0.02 (winter)                                             | 2.51 | <0.001 | Two tailed Paired t-test       |

|                             |                                           |      |    |                                                                                                             |      |         |                                                                                          |
|-----------------------------|-------------------------------------------|------|----|-------------------------------------------------------------------------------------------------------------|------|---------|------------------------------------------------------------------------------------------|
| S2E<br>(summer-<br>spring)  | Normalized<br>Brain volume                | 8    | 8  | 1.26 ± 0.06<br>(summer);<br>1.20 ± 0.04<br>(spring)                                                         | 1.79 | <0.001  | Two tailed<br>Paired t-test                                                              |
| S2E                         | Normalized<br>Brain Volume                | 8    | 8  | 1.26 ± 0.06<br>(summer);<br>1.20 ± 0.05<br>(autumn);<br>1.19 ± 0.05<br>(winter);<br>1.20 ± 0.04<br>(spring) | -    | <0.001  | One-way<br>repeated<br>measure<br>ANOVA                                                  |
| S3C                         | Cortex<br>Thickness<br>(µm)               | 30   | 10 | 615.8 ± 8.57<br>(summer); 569 ±<br>19.65 (winter)                                                           | 0.80 | 0.0477  | Two tailed<br>Mann<br>Whitney U<br>test<br>(Bonferroni<br>corrected $\alpha$<br>= 0.017) |
| S3D                         | Cortex<br>Thickness<br>(µm)               | 27   | 9  | 232.2 ± 14.85<br>(summer); 201.4<br>± 8.4 (winter)                                                          | 0.73 | 0.0672  | Two tailed<br>Mann<br>Whitney U<br>test<br>(Bonferroni<br>corrected $\alpha$<br>= 0.017) |
| S8A<br>(L2,<br>suppressed)  | Cell responses                            | 231  | 12 | 44% (summer);<br>32% (winter)                                                                               | -    | 0.0023  | z-test<br>(Bonferroni<br>corrected $\alpha$<br>= 0.017)                                  |
| S8A<br>(L3,<br>suppressed)  | Cell responses                            | 108  | 12 | 34% (summer);<br>24% (winter)                                                                               | -    | 0.038   | z-test<br>(Bonferroni<br>corrected $\alpha$<br>= 0.017)                                  |
| S8A<br>(L4,<br>suppressed)  | Cell responses                            | 69   | 12 | 55% (summer);<br>24% (winter)                                                                               | -    | <0.0001 | z-test<br>(Bonferroni<br>corrected $\alpha$<br>= 0.017)                                  |
| S8A<br>(All,<br>suppressed) | Cell responses                            | 420  | 12 | 43% (summer);<br>28% (winter)                                                                               | -    | <0.0001 | z-test                                                                                   |
| S8B<br>(L2,<br>suppressed)  | Cell responses                            | 190  | 12 | 40% (summer);<br>34% (winter)                                                                               | -    | <0.0001 | z-test<br>(Bonferroni<br>corrected $\alpha$<br>= 0.017)                                  |
| S8B<br>(L3,<br>suppressed)  | Cell responses                            | 99   | 12 | 43% (summer);<br>17% (winter)                                                                               | -    | <0.0001 | z-test<br>(Bonferroni<br>corrected $\alpha$<br>= 0.017)                                  |
| S8B<br>(L4,<br>suppressed)  | Cell responses                            | 66   | 12 | 65% (summer);<br>13% (winter)                                                                               | -    | <0.0001 | z-test<br>(Bonferroni<br>corrected $\alpha$<br>= 0.017)                                  |
| S8B<br>(All,<br>suppressed) | Cell responses                            | 435  | 12 | 45% (summer);<br>20% (winter)                                                                               | -    | <0.0001 | z-test                                                                                   |
| S9B                         | Response rate<br>change (s <sup>2</sup> ) | 1248 | 12 | -1.19 ± 0.27<br>(summer); -0.26<br>± 0.16 (winter)                                                          | 0.19 | 0.0017  | Two tailed<br>Unpaired t-<br>test<br>(Bonferroni<br>corrected $\alpha$<br>= 0.0031)      |

**Table S2. Location of nodes used to determine changes along the cortical axes in standard shrew space coordinates.**

| <u>Axes</u>  | <u>LocationID</u> | <u>Node 1</u>                | <u>Node 2</u>                | <u>Node 3</u> | <u>Node 4</u> |
|--------------|-------------------|------------------------------|------------------------------|---------------|---------------|
| Radial       | R1                | (-2.47000,-0.72000,-1.77000) | (-3.10000,-0.72000,-1.77000) |               |               |
|              | R2                | (-2.19000,-0.72000,-0.86000) | (-2.47000,-0.72000,-0.65000) |               |               |
|              | R3                | (-1.14000,-0.72000,-0.30000) | (-1.42000,-0.72000,0.12000)  |               |               |
|              | R4                | (1.10000,-0.72000,-0.30000)  | (1.31000,-0.72000,0.12000)   |               |               |
|              | R5                | (2.22000,-0.72000,-0.86000)  | (2.43000,-0.72000,-0.65000)  |               |               |
|              | R6                | (2.50000,-0.72000,-1.77000)  | (3.13000,-0.72000,-1.77000)  |               |               |
|              | R7                | (-2.19000,-0.44000,-1.77000) | (-3.10000,-0.44000,-1.77000) |               |               |
|              | R8                | (-1.98000,-0.44000,-0.86000) | (-2.33000,-0.44000,-0.58000) |               |               |
|              | R9                | (-1.00000,-0.44000,-0.37000) | (-1.21000,-0.44000,0.12000)  |               |               |
|              | R10               | (0.96000,-0.44000,-0.37000)  | (1.17000,-0.44000,0.12000)   |               |               |
|              | R11               | (2.01000,-0.44000,-1.00000)  | (2.36000,-0.44000,-0.58000)  |               |               |
|              | R12               | (2.29000,-0.44000,-1.77000)  | (3.13000,-0.44000,-1.77000)  |               |               |
|              | R13               | (-2.26000,-0.02000,-1.77000) | (-2.96000,-0.02000,-1.77000) |               |               |
|              | R14               | (-1.98000,-0.02000,-0.79000) | (-2.26000,-0.02000,-0.58000) |               |               |
|              | R15               | (-1.14000,-0.02000,-0.44000) | (-1.35000,-0.02000,0.05000)  |               |               |
|              | R16               | (1.03000,-0.02000,-0.44000)  | (1.31000,-0.02000,0.05000)   |               |               |
|              | R17               | (2.01000,-0.02000,-0.86000)  | (2.29000,-0.02000,-0.58000)  |               |               |
|              | R18               | (2.01000,-0.02000,-1.77000)  | (2.99000,-0.02000,-1.77000)  |               |               |
|              | R19               | (-1.98000,0.40000,-1.77000)  | (-2.96000,0.40000,-1.77000)  |               |               |
|              | R20               | (-1.98000,0.40000,-0.86000)  | (-2.19000,0.40000,-0.65000)  |               |               |
|              | R21               | (-0.93000,0.40000,-0.51000)  | (-1.14000,0.40000,-0.02000)  |               |               |
|              | R22               | (0.89000,0.40000,-0.51000)   | (1.10000,0.40000,-0.02000)   |               |               |
|              | R23               | (1.87000,0.40000,-0.86000)   | (2.15000,0.40000,-0.65000)   |               |               |
|              | R24               | (1.94000,0.40000,-1.84000)   | (2.92000,0.40000,-1.84000)   |               |               |
| Longitudinal | L1                | (-2.34400,-2.19000,-0.66400) | (-1.77000,0.82000,-0.65000)  |               |               |
|              | L2                | (2.30400,-2.19000,-0.66400)  | (1.73000,0.89000,-0.65000)   |               |               |
|              | L3                | (-2.27400,-2.19000,-0.59400) | (-1.49000,0.82000,-0.58000)  |               |               |
|              | L4                | (2.22000,-2.19000,-0.59400)  | (1.10000,0.75000,-0.58000)   |               |               |
|              | L5                | (-2.19000,-2.19000,-0.51000) | (-0.23000,0.82000,-0.52400)  |               |               |
|              | L6                | (2.22000,-2.19000,-0.51000)  | (0.20400,0.82000,-0.52400)   |               |               |

|                  |     |                              |                              |                              |                              |
|------------------|-----|------------------------------|------------------------------|------------------------------|------------------------------|
|                  | L7  | (-2.13400,-2.26000,-0.45400) | (-0.23000,0.83400,-0.45400)  |                              |                              |
|                  | L8  | (2.06600,-2.26000,-0.45400)  | (0.12000,0.83400,-0.45400)   |                              |                              |
|                  | L9  | (-2.06400,-2.26000,-0.38400) | (-0.24400,0.75000,-0.38400)  |                              |                              |
|                  | L10 | (2.16400,-2.26000,-0.38400)  | (0.12000,0.75000,-0.38400)   |                              |                              |
|                  | L11 | (-1.98000,-2.27400,-0.31400) | (-0.14600,0.75000,-0.31400)  |                              |                              |
|                  | L12 | (2.08000,-2.26000,-0.30000)  | (0.12000,0.75000,-0.31400)   |                              |                              |
|                  | L13 | (-1.98000,-2.19000,-0.23000) | (-0.23000,0.75000,-0.24400)  |                              |                              |
|                  | L14 | (2.02400,-2.19000,-0.24400)  | (0.10600,0.75000,-0.24400)   |                              |                              |
|                  | L15 | (-1.77000,-2.26000,-0.16000) | (-0.23000,0.76400,-0.17400)  |                              |                              |
|                  | L16 | (1.94000,-2.19000,-0.16000)  | (0.19000,0.76400,-0.17400)   |                              |                              |
|                  | L17 | (-1.70000,-2.19000,-0.09000) | (-0.23000,0.68000,-0.10400)  |                              |                              |
|                  | L18 | (1.80000,-2.19000,-0.09000)  | (0.20400,0.68000,-0.10400)   |                              |                              |
|                  | L19 | (-1.50400,-2.12000,-0.03400) | (-0.23000,0.69400,-0.03400)  |                              |                              |
|                  | L20 | (1.73000,-2.05000,-0.02000)  | (0.12000,0.69400,-0.03400)   |                              |                              |
|                  | L21 | (-1.42000,-2.12000,0.05000)  | (-0.23000,0.62400,0.03600)   |                              |                              |
|                  | L22 | (1.53400,-2.05000,0.03600)   | (0.12000,0.61000,0.05000)    |                              |                              |
|                  | L23 | (-1.35000,-2.05000,0.12000)  | (-0.23000,0.54000,0.12000)   |                              |                              |
|                  | L24 | (1.45000,-2.05000,0.12000)   | (0.19000,0.54000,0.12000)    |                              |                              |
| Cortical Surface | C1  | (-2.47000,-0.72000,-1.77000) | (-2.19000,-0.72000,-0.86000) | (-1.14000,-0.72000,-0.30000) | (-0.23000,-0.72000,-0.09000) |
|                  | C2  | (-2.78500,-0.72000,-1.77000) | (-2.33000,-0.72000,-0.75500) | (-1.28000,-0.72000,-0.09000) | (-0.23000,-0.72000,0.12000)  |
|                  | C3  | (-3.10000,-0.72000,-1.77000) | (-2.47000,-0.72000,-0.65000) | (-1.42000,-0.72000,0.12000)  | (-0.23000,-0.72000,0.33000)  |
|                  | C4  | (0.19000,-0.72000,-0.09000)  | (1.10000,-0.72000,-0.30000)  | (2.22000,-0.72000,-0.86000)  | (2.50000,-0.72000,-1.77000)  |
|                  | C5  | (0.19000,-0.72000,0.12000)   | (1.20500,-0.72000,-0.09000)  | (2.32500,-0.72000,-0.75500)  | (2.81500,-0.72000,-1.77000)  |
|                  | C6  | (0.19000,-0.72000,0.33000)   | (1.31000,-0.72000,0.12000)   | (2.43000,-0.72000,-0.65000)  | (3.13000,-0.72000,-1.77000)  |
|                  | C7  | (-2.19000,-0.44000,-1.77000) | (-1.98000,-0.44000,-0.86000) | (-1.00000,-0.44000,-0.37000) | (-0.16000,-0.44000,-0.37000) |
|                  | C8  | (-2.64500,-0.44000,-1.77000) | (-2.15500,-0.44000,-0.72000) | (-1.10500,-0.44000,-0.12500) | (-0.16000,-0.44000,-0.05500) |
|                  | C9  | (-3.10000,-0.44000,-1.77000) | (-2.33000,-0.44000,-0.58000) | (-1.21000,-0.44000,0.12000)  | (-0.16000,-0.44000,0.26000)  |
|                  | C10 | (0.19000,-0.44000,-0.37000)  | (0.96000,-0.44000,-0.37000)  | (2.01000,-0.44000,-1.00000)  | (2.29000,-0.44000,-1.77000)  |
|                  | C11 | (0.19000,-0.44000,-0.05500)  | (1.06500,-0.44000,-0.12500)  | (2.18500,-0.44000,-0.79000)  | (2.71000,-0.44000,-1.77000)  |
|                  | C12 | (0.19000,-0.44000,0.26000)   | (1.17000,-0.44000,0.12000)   | (2.36000,-0.44000,-0.58000)  | (3.13000,-0.44000,-1.77000)  |
|                  | C13 | (-2.26000,-0.02000,-1.77000) | (-1.98000,-0.02000,-0.79000) | (-1.14000,-0.02000,-0.44000) | (-0.23000,-0.02000,-0.30000) |
|                  | C14 | (-2.61000,-0.02000,-1.77000) | (-2.12000,-0.02000,-0.68500) | (-1.24500,-0.02000,-0.19500) | (-0.23000,-0.02000,-0.05500) |
|                  | C15 | (-2.96000,-0.02000,-1.77000) | (-2.26000,-0.02000,-0.58000) | (-1.35000,-0.02000,0.05000)  | (-0.23000,-0.02000,0.19000)  |

|     |                                 |                                 |                                 |                                 |
|-----|---------------------------------|---------------------------------|---------------------------------|---------------------------------|
| C16 | (0.12000,-0.02000,-<br>0.30000) | (1.03000,-0.02000,-<br>0.44000) | (2.01000,-0.02000,-<br>0.86000) | (2.01000,-0.02000,-<br>1.77000) |
| C17 | (0.12000,-0.02000,-<br>0.05500) | (1.17000,-0.02000,-<br>0.19500) | (2.15000,-0.02000,-<br>0.72000) | (2.50000,-0.02000,-<br>1.77000) |
| C18 | (0.12000,-<br>0.02000,0.19000)  | (1.31000,-<br>0.02000,0.05000)  | (2.29000,-0.02000,-<br>0.58000) | (2.99000,-0.02000,-<br>1.77000) |
| C19 | (-1.98000,0.40000,-<br>1.77000) | (-1.98000,0.40000,-<br>0.86000) | (-0.93000,0.40000,-<br>0.51000) | (-0.16000,0.40000,-<br>0.51000) |
| C20 | (-2.47000,0.40000,-<br>1.77000) | (-2.08500,0.40000,-<br>0.75500) | (-1.03500,0.40000,-<br>0.26500) | (-0.16000,0.40000,-<br>0.19500) |
| C21 | (-2.96000,0.40000,-<br>1.77000) | (-2.19000,0.40000,-<br>0.65000) | (-1.14000,0.40000,-<br>0.02000) | (-<br>0.16000,0.40000,0.12000)  |
| C22 | (0.12000,0.40000,-<br>0.51000)  | (0.89000,0.40000,-<br>0.51000)  | (1.87000,0.40000,-<br>0.86000)  | (1.94000,0.40000,-<br>1.84000)  |
| C23 | (0.12000,0.40000,-<br>0.19500)  | (0.99500,0.40000,-<br>0.26500)  | (2.01000,0.40000,-<br>0.75500)  | (2.43000,0.40000,-<br>1.84000)  |
| C24 | (0.12000,0.40000,0.12<br>000)   | (1.10000,0.40000,-<br>0.02000)  | (2.15000,0.40000,-<br>0.65000)  | (2.92000,0.40000,-<br>1.84000)  |

**Table S3. Primary antibody list.**

| <b>Antigen</b>                             | <b>Host</b>         | <b>Dilution</b> | <b>Source</b> | <b>Catalog number</b> |
|--------------------------------------------|---------------------|-----------------|---------------|-----------------------|
| Foxp2                                      | Rabbit              | 1:500           | SIGMA         | HPA000382             |
| Biotinylated Wisteria<br>Floribunda Lectin | -                   | 1:1000          | VECTOR        | B-1355                |
| NeuN                                       | Rabbit              | 1:1000          | Servicebio    | GB11138               |
| Parvalbumin                                | Mouse<br>monoclonal | 1:5000          | Swant         | PV235                 |
| PCP4                                       | Rabbit              | 1:500           | Sigma         | HPA005792             |

**Table S4. Primers used to amplify DNA fragments.**

| <b>Gene name</b> | <b>Species</b>     | <b>Primer set</b>                                                                   | <b>template</b> |
|------------------|--------------------|-------------------------------------------------------------------------------------|-----------------|
| Er81             | Suncus<br>Etruscus | Fw-TACAGGAAACATGGCTTGCAGAAGCTCAGGTACC<br>Re-TTCGTTGATGTGACGTTCCATGTCTGTCTTCAGTAGTGG | cDNA            |
| Rorb             | Suncus<br>Etruscus | Fw-AGCAGCAGCATCAGTAATGGGCTAAGCAACC<br>Re-AGACGGTGGCACAGTCAGGATTAAGAGCTCC            | cDNA            |
| Sulf2            | Suncus<br>Etruscus | Fw-ATGTGCCACCCGGCTGGAAGG<br>Re-TTGGAGAGTGCCTGGACCCAGGG                              | cDNA            |
